# Supplementary material for: DFT study of CO2 hydrogenation catalyzed by a cobalt-based system: an unexpected formate anion-assisted deprotonation mechanism
Source: Royal Society of Chemistry journal article supplement (doi:10.1039/c7cy02012k), 2017-12-12
Supplement: c7cy02012k1.pdf [file c7cy02012k1.pdf]

Supporting Information of

**DFT Study of CO<sub>2</sub> Hydrogenation Catalyzed by a Cobalt-Base System: an  
Unexpected Formate Anion Assisted Deprotonation Mechanism**

Zhihan Zhang, Cheng Hou, Yinwu Li, Cunyuan Zhao, and Zhuofeng Ke\*

School of Materials Science and Engineering, School of Chemistry, MOE Key Laboratory of  
Bioinorganic and Synthetic Chemistry, Sun Yat-sen University, Guangzhou 510275, P. R. China.

\*Corresponding Author: [kezhf3@mail.sysu.edu.cn](mailto:kezhf3@mail.sysu.edu.cn)

## 1 Some optimized structures of intermediates

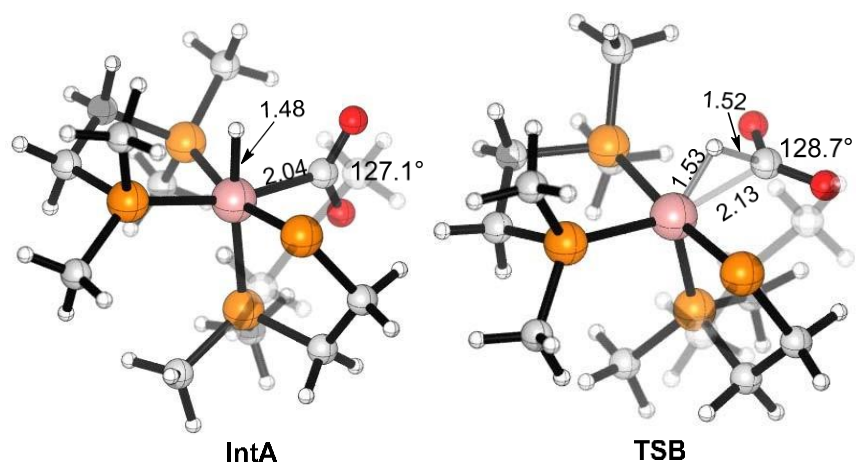

Figure S1. Optimized structures of intermediate and transition state involve in hydrogenation step.

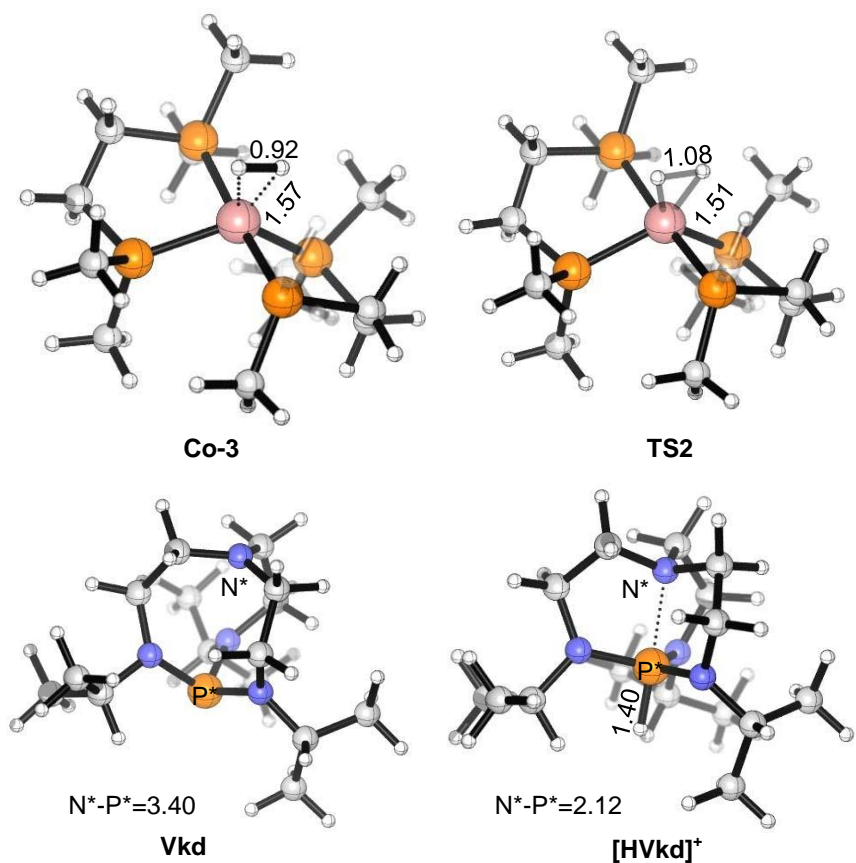

Figure S2. Optimized Structures of intermediates and transition state involve in oxidative addition and deprotonation step in scheme 1.

## 2 The Calculation of Hydricity of Monohydride and Dihydride in Different Solvent

Table S1. The Calculated Hydricity in different solvent

| Species                      | THF  | Acetonitrile |
|------------------------------|------|--------------|
| <b>Co-1</b><br>(monohydride) | 33.7 | 31.9         |
| <b>Co-2</b><br>(dihydride)   | 96.5 | 81.3         |

## 3 The Cartesian Coordinates (xyz) for all optimized structures are presented

Co-1-HCOOH

E= -2177.234188 a.u.

|    |           |           |           |
|----|-----------|-----------|-----------|
| 27 | 0.084292  | -0.037977 | -0.187518 |
| 1  | -0.119822 | 0.553340  | -1.558092 |
| 15 | 2.135809  | -0.511049 | -0.873081 |
| 6  | 2.380945  | -0.802576 | -2.680179 |
| 1  | 3.442623  | -0.783731 | -2.956807 |
| 1  | 1.846888  | -0.036351 | -3.250945 |
| 1  | 1.966818  | -1.777999 | -2.956060 |
| 6  | 3.323514  | -1.769158 | -0.218962 |
| 1  | 4.282667  | -1.738609 | -0.750775 |
| 1  | 2.899182  | -2.774323 | -0.321824 |
| 1  | 3.512703  | -1.586227 | 0.843212  |
| 6  | 3.142823  | 1.037543  | -0.613617 |
| 1  | 3.994615  | 1.081454  | -1.303725 |
| 1  | 3.550188  | 0.980132  | 0.404800  |
| 6  | 2.247620  | 2.270414  | -0.744343 |
| 1  | 2.762851  | 3.180747  | -0.413643 |
| 1  | 1.954698  | 2.417900  | -1.791462 |
| 6  | 1.195139  | 2.570367  | 1.899869  |
| 1  | 1.699993  | 3.542931  | 1.859886  |
| 1  | 1.875820  | 1.839696  | 2.348762  |

|    |           |           |           |
|----|-----------|-----------|-----------|
| 1  | 0.318470  | 2.665354  | 2.548815  |
| 6  | -0.258249 | 3.517858  | -0.307138 |
| 1  | 0.372669  | 4.413380  | -0.250425 |
| 1  | -1.129785 | 3.668224  | 0.338459  |
| 1  | -0.612905 | 3.390318  | -1.333767 |
| 15 | 0.671210  | 2.015499  | 0.216684  |
| 15 | -0.098423 | -0.899762 | 1.813504  |
| 6  | 1.344402  | -1.300036 | 2.888593  |
| 1  | 1.023519  | -1.711191 | 3.853124  |
| 1  | 1.941923  | -0.400717 | 3.070979  |
| 1  | 1.978710  | -2.038445 | 2.389052  |
| 6  | -1.194997 | -0.082404 | 3.049906  |
| 1  | -1.306257 | -0.690756 | 3.955552  |
| 1  | -2.180424 | 0.095825  | 2.609754  |
| 1  | -0.773642 | 0.887786  | 3.330996  |
| 6  | -0.891859 | -2.573115 | 1.658027  |
| 1  | -0.104378 | -3.269424 | 1.342389  |
| 1  | -1.277431 | -2.923345 | 2.623276  |
| 6  | -1.985565 | -2.499055 | 0.592403  |
| 1  | -2.855341 | -1.952715 | 0.978879  |
| 1  | -2.332940 | -3.493893 | 0.288678  |
| 6  | -0.651025 | -2.867630 | -1.932962 |
| 1  | -1.401265 | -3.636189 | -2.155683 |
| 1  | 0.208224  | -3.339905 | -1.445114 |
| 1  | -0.310643 | -2.426637 | -2.875770 |
| 6  | -2.878861 | -1.178060 | -1.785797 |
| 1  | -3.416092 | -2.103953 | -2.024677 |
| 1  | -2.636122 | -0.658500 | -2.717612 |
| 1  | -3.538148 | -0.533447 | -1.198945 |
| 15 | -1.328997 | -1.528858 | -0.853462 |

|   |           |          |           |
|---|-----------|----------|-----------|
| 6 | -3.400484 | 2.128131 | -0.543773 |
| 8 | -3.067368 | 2.261492 | -1.703294 |
| 8 | -2.762554 | 1.454034 | 0.392657  |
| 1 | -4.319465 | 2.578509 | -0.136556 |
| 1 | -1.888800 | 1.030824 | 0.076495  |

Co-1

E= -1987.496489 a.u.

|    |           |           |           |
|----|-----------|-----------|-----------|
| 27 | 0.041973  | 0.007032  | -0.291470 |
| 15 | -1.478783 | 1.574327  | -0.153142 |
| 6  | -1.698777 | 2.876405  | 1.141008  |
| 1  | -2.644829 | 3.416675  | 1.010576  |
| 1  | -0.875915 | 3.597984  | 1.089556  |
| 1  | -1.692580 | 2.422965  | 2.136740  |
| 6  | -1.795491 | 2.601479  | -1.655636 |
| 1  | -2.667308 | 3.257074  | -1.539155 |
| 1  | -1.953716 | 1.941987  | -2.515183 |
| 1  | -0.913649 | 3.216519  | -1.866587 |
| 6  | -3.111534 | 0.680433  | 0.022266  |
| 1  | -3.263465 | 0.518046  | 1.098073  |
| 1  | -3.946056 | 1.297346  | -0.335312 |
| 6  | -3.059669 | -0.669431 | -0.698402 |
| 1  | -3.044042 | -0.517191 | -1.785263 |
| 1  | -3.939692 | -1.282129 | -0.464297 |
| 15 | -1.477721 | -1.563073 | -0.264272 |
| 6  | -2.012378 | -2.488621 | 1.245766  |
| 1  | -2.942348 | -3.045428 | 1.076404  |
| 1  | -2.168618 | -1.788307 | 2.073684  |
| 1  | -1.233436 | -3.198380 | 1.542748  |
| 6  | -1.527236 | -2.937127 | -1.494912 |

|    |           |           |           |
|----|-----------|-----------|-----------|
| 1  | -2.494666 | -3.454610 | -1.505516 |
| 1  | -0.741130 | -3.663760 | -1.261497 |
| 1  | -1.325845 | -2.531858 | -2.492022 |
| 15 | 1.981221  | 0.042014  | -1.205837 |
| 6  | 2.440180  | -1.182391 | -2.506187 |
| 1  | 3.497981  | -1.111292 | -2.787795 |
| 1  | 1.825241  | -1.009287 | -3.396132 |
| 1  | 2.230724  | -2.194398 | -2.144405 |
| 6  | 2.554636  | 1.591668  | -2.034550 |
| 1  | 3.554050  | 1.491765  | -2.476162 |
| 1  | 2.563097  | 2.406777  | -1.303025 |
| 1  | 1.840771  | 1.857238  | -2.821936 |
| 6  | 3.316718  | -0.223155 | 0.065029  |
| 1  | 3.440138  | -1.306968 | 0.186619  |
| 1  | 4.280391  | 0.185400  | -0.262683 |
| 6  | 2.843265  | 0.401442  | 1.378193  |
| 1  | 2.888333  | 1.496154  | 1.312778  |
| 1  | 3.461953  | 0.094585  | 2.230574  |
| 15 | 1.057249  | -0.052152 | 1.642045  |
| 6  | 1.227932  | -1.672557 | 2.512201  |
| 1  | 1.966243  | -1.622718 | 3.321519  |
| 1  | 1.532063  | -2.442626 | 1.796336  |
| 1  | 0.263802  | -1.966466 | 2.938706  |
| 6  | 0.636809  | 1.018828  | 3.081312  |
| 1  | 1.346882  | 0.876247  | 3.904842  |
| 1  | -0.369316 | 0.778665  | 3.441701  |
| 1  | 0.653238  | 2.071024  | 2.780777  |
| 1  | -0.377776 | 0.020503  | -1.733437 |

E= -1986.802909 a.u.

|    |           |           |           |
|----|-----------|-----------|-----------|
| 27 | -0.000001 | -0.000002 | 0.000001  |
| 15 | -1.615796 | -1.496692 | 0.084905  |
| 6  | -1.676585 | -3.014464 | -0.942930 |
| 1  | -2.629669 | -3.535634 | -0.800469 |
| 1  | -0.864583 | -3.696644 | -0.676314 |
| 1  | -1.574006 | -2.749737 | -1.999913 |
| 6  | -1.875000 | -2.144957 | 1.783334  |
| 1  | -2.780863 | -2.758718 | 1.841635  |
| 1  | -1.961739 | -1.309507 | 2.485275  |
| 1  | -1.014431 | -2.749733 | 2.085173  |
| 6  | -3.244605 | -0.702964 | -0.298359 |
| 1  | -3.338972 | -0.655858 | -1.390159 |
| 1  | -4.073119 | -1.312044 | 0.079537  |
| 6  | -3.244584 | 0.702954  | 0.298573  |
| 1  | -3.338871 | 0.655846  | 1.390379  |
| 1  | -4.073126 | 1.312034  | -0.079261 |
| 15 | -1.615804 | 1.496687  | -0.084804 |
| 6  | -1.875143 | 2.144992  | -1.783196 |
| 1  | -2.781028 | 2.758729  | -1.841416 |
| 1  | -1.961905 | 1.309560  | -2.485156 |
| 1  | -1.014613 | 2.749802  | -2.085076 |
| 6  | -1.676515 | 3.014442  | 0.943064  |
| 1  | -2.629621 | 3.535599  | 0.800700  |
| 1  | -0.864550 | 3.696637  | 0.676375  |
| 1  | -1.573827 | 2.749701  | 2.000033  |
| 15 | 1.615803  | 1.496689  | 0.084771  |
| 6  | 1.676516  | 3.014421  | -0.943131 |
| 1  | 2.629622  | 3.535581  | -0.800777 |
| 1  | 0.864551  | 3.696623  | -0.676457 |

|    |          |           |           |
|----|----------|-----------|-----------|
| 1  | 1.573828 | 2.749657  | -2.000094 |
| 6  | 1.875140 | 2.145032  | 1.783150  |
| 1  | 2.781030 | 2.758763  | 1.841360  |
| 1  | 1.961892 | 1.309615  | 2.485129  |
| 1  | 1.014614 | 2.749856  | 2.085013  |
| 6  | 3.244584 | 0.702947  | -0.298584 |
| 1  | 3.338874 | 0.655813  | -1.390389 |
| 1  | 4.073125 | 1.312037  | 0.079237  |
| 6  | 3.244604 | -0.702956 | 0.298383  |
| 1  | 3.338966 | -0.655823 | 1.390182  |
| 1  | 4.073119 | -1.312046 | -0.079495 |
| 15 | 1.615797 | -1.496693 | -0.084870 |
| 6  | 1.875003 | -2.144982 | -1.783291 |
| 1  | 2.780879 | -2.758724 | -1.841588 |
| 1  | 1.961716 | -1.309543 | -2.485248 |
| 1  | 1.014446 | -2.749784 | -2.085112 |
| 6  | 1.676588 | -3.014452 | 0.942985  |
| 1  | 2.629670 | -3.535625 | 0.800525  |
| 1  | 0.864582 | -3.696633 | 0.676383  |
| 1  | 1.574016 | -2.749710 | 1.999965  |

## CO2

E= -188.526181a.u.

|   |          |          |           |
|---|----------|----------|-----------|
| 6 | 0.000000 | 0.000000 | 0.000000  |
| 8 | 0.000000 | 0.000000 | 1.165177  |
| 8 | 0.000000 | 0.000000 | -1.165177 |

## Co-3

E= -1987.991157 a.u.

|    |          |           |           |
|----|----------|-----------|-----------|
| 27 | 0.000057 | -0.000058 | -0.464011 |
|----|----------|-----------|-----------|



|    |           |           |           |
|----|-----------|-----------|-----------|
| 1  | -0.185239 | 0.421635  | -1.964163 |
| 1  | 0.185700  | -0.422255 | -1.963973 |
| 15 | -0.791559 | 1.802983  | 0.570003  |
| 6  | -0.487402 | 3.416601  | -0.253479 |
| 1  | -0.972170 | 4.241210  | 0.281453  |
| 1  | -0.872563 | 3.374706  | -1.277463 |
| 1  | 0.587843  | 3.614191  | -0.303466 |
| 6  | -0.399475 | 2.192696  | 2.321255  |
| 1  | -0.993334 | 3.043355  | 2.675166  |
| 1  | 0.660478  | 2.436098  | 2.435044  |
| 1  | -0.620414 | 1.319598  | 2.943734  |
| 6  | -2.649010 | 1.716751  | 0.620775  |
| 1  | -3.080861 | 2.722548  | 0.582318  |
| 1  | -2.928526 | 1.276906  | 1.585847  |
| 6  | -3.154556 | 0.837801  | -0.524196 |
| 1  | -4.215547 | 0.588582  | -0.410170 |
| 1  | -3.026666 | 1.345268  | -1.487847 |
| 6  | -2.835064 | -1.700750 | 0.770516  |
| 1  | -3.909549 | -1.835782 | 0.606302  |
| 1  | -2.679837 | -1.214315 | 1.738219  |
| 1  | -2.360272 | -2.685824 | 0.797560  |
| 6  | -2.610767 | -1.566269 | -2.080215 |
| 1  | -3.686073 | -1.774038 | -2.079810 |
| 1  | -2.062292 | -2.511486 | -2.147896 |
| 1  | -2.359469 | -0.960466 | -2.956305 |
| 15 | -2.107718 | -0.680210 | -0.563858 |
| 15 | 0.791402  | -1.802777 | 0.570737  |
| 6  | 0.398888  | -2.191906 | 2.322019  |
| 1  | 0.992593  | -3.042499 | 2.676345  |
| 1  | -0.661113 | -2.435183 | 2.435631  |

|    |           |           |           |
|----|-----------|-----------|-----------|
| 1  | 0.619747  | -1.318626 | 2.944273  |
| 6  | 0.487365  | -3.416639 | -0.252305 |
| 1  | 0.971911  | -4.241110 | 0.283040  |
| 1  | 0.872839  | -3.375103 | -1.276186 |
| 1  | -0.587882 | -3.614161 | -0.302558 |
| 6  | 2.648843  | -1.716603 | 0.621887  |
| 1  | 2.928183  | -1.276496 | 1.586891  |
| 1  | 3.080663  | -2.722429 | 0.583808  |
| 6  | 3.154664  | -0.838016 | -0.523238 |
| 1  | 3.026970  | -1.345770 | -1.486765 |
| 1  | 4.215638  | -0.588797 | -0.409061 |
| 6  | 2.834994  | 1.700952  | 0.770594  |
| 1  | 3.909534  | 1.835816  | 0.606603  |
| 1  | 2.679474  | 1.214880  | 1.738433  |
| 1  | 2.360309  | 2.686087  | 0.797177  |
| 6  | 2.611293  | 1.565585  | -2.080131 |
| 1  | 3.686605  | 1.773323  | -2.079550 |
| 1  | 2.062858  | 2.510794  | -2.148234 |
| 1  | 2.360177  | 0.959512  | -2.956088 |
| 15 | 2.107883  | 0.680016  | -0.563608 |

Co-4

E= -1988.003474 a.u.

|    |           |           |           |
|----|-----------|-----------|-----------|
| 27 | 0.000020  | -0.000015 | -0.507339 |
| 1  | 0.325925  | -0.955876 | -1.587877 |
| 1  | -0.325814 | 0.955793  | -1.587944 |
| 15 | 0.763285  | -1.589648 | 0.885753  |
| 6  | 0.686180  | -3.295424 | 0.222241  |
| 1  | 1.271006  | -3.980980 | 0.845334  |
| 1  | 1.073282  | -3.312835 | -0.800528 |

|    |           |           |           |
|----|-----------|-----------|-----------|
| 1  | -0.351750 | -3.639374 | 0.202212  |
| 6  | 0.200369  | -1.833937 | 2.611830  |
| 1  | 0.662603  | -2.728648 | 3.043277  |
| 1  | -0.887348 | -1.952789 | 2.641685  |
| 1  | 0.477238  | -0.971640 | 3.223740  |
| 6  | 2.580852  | -1.295115 | 1.074208  |
| 1  | 3.088166  | -2.206570 | 1.409133  |
| 1  | 2.709106  | -0.536845 | 1.856630  |
| 6  | 3.147743  | -0.789053 | -0.253766 |
| 1  | 4.186958  | -0.458167 | -0.151755 |
| 1  | 3.121968  | -1.583370 | -1.009420 |
| 6  | 2.783528  | 2.075505  | -0.079905 |
| 1  | 3.866725  | 2.118870  | -0.237951 |
| 1  | 2.578936  | 2.070617  | 0.995098  |
| 1  | 2.333925  | 2.971484  | -0.517735 |
| 6  | 2.582827  | 0.791283  | -2.618087 |
| 1  | 3.662755  | 0.956017  | -2.697577 |
| 1  | 2.056919  | 1.648178  | -3.050072 |
| 1  | 2.306994  | -0.103179 | -3.184096 |
| 15 | 2.079166  | 0.583604  | -0.876669 |
| 15 | -0.763353 | 1.589696  | 0.885615  |
| 6  | -0.200598 | 1.834040  | 2.611737  |
| 1  | -0.662880 | 2.728760  | 3.043117  |
| 1  | 0.887115  | 1.952905  | 2.641684  |
| 1  | -0.477512 | 0.971758  | 3.223646  |
| 6  | -0.686181 | 3.295451  | 0.222057  |
| 1  | -1.271056 | 3.981025  | 0.845085  |
| 1  | -1.073203 | 3.312833  | -0.800743 |
| 1  | 0.351749  | 3.639402  | 0.202104  |
| 6  | -2.580942 | 1.295200  | 1.073913  |

|    |           |           |           |
|----|-----------|-----------|-----------|
| 1  | -2.709285 | 0.536980  | 1.856368  |
| 1  | -3.088275 | 2.206685  | 1.408732  |
| 6  | -3.147714 | 0.789067  | -0.254081 |
| 1  | -3.121853 | 1.583336  | -1.009785 |
| 1  | -4.186945 | 0.458207  | -0.152148 |
| 6  | -2.783517 | -2.075477 | -0.079930 |
| 1  | -3.866705 | -2.118854 | -0.238031 |
| 1  | -2.578980 | -2.070496 | 0.995084  |
| 1  | -2.333889 | -2.971496 | -0.517655 |
| 6  | -2.582620 | -0.791483 | -2.618222 |
| 1  | -3.662542 | -0.956217 | -2.697789 |
| 1  | -2.056681 | -1.648424 | -3.050079 |
| 1  | -2.306732 | 0.102924  | -3.184293 |
| 15 | -2.079100 | -0.583649 | -0.876783 |

Co-F-TS6

E= -2177.223725 a.u.

|    |           |           |           |
|----|-----------|-----------|-----------|
| 27 | -0.109022 | 0.038594  | -0.261122 |
| 15 | 0.336550  | -1.076427 | 1.591215  |
| 6  | 2.032810  | -1.576804 | 2.114544  |
| 1  | 1.986731  | -2.358360 | 2.882781  |
| 1  | 2.579602  | -0.725108 | 2.527171  |
| 1  | 2.579969  | -1.956408 | 1.246614  |
| 6  | -0.308682 | -0.432557 | 3.198574  |
| 1  | -0.030879 | -1.074923 | 4.043550  |
| 1  | -1.400416 | -0.364171 | 3.149609  |
| 1  | 0.086274  | 0.573826  | 3.376621  |
| 6  | -0.474718 | -2.750736 | 1.518850  |
| 1  | 0.229221  | -3.425386 | 1.015906  |
| 1  | -0.645347 | -3.148583 | 2.526194  |

|    |           |           |           |
|----|-----------|-----------|-----------|
| 6  | -1.768518 | -2.649916 | 0.714127  |
| 1  | -2.535604 | -2.112617 | 1.286354  |
| 1  | -2.174955 | -3.634777 | 0.455280  |
| 15 | -1.419608 | -1.646944 | -0.802828 |
| 6  | -0.687801 | -2.879857 | -1.948691 |
| 1  | -1.332052 | -3.760667 | -2.051676 |
| 1  | 0.300235  | -3.181360 | -1.591699 |
| 1  | -0.555070 | -2.414764 | -2.931046 |
| 6  | -3.098131 | -1.475537 | -1.530560 |
| 1  | -3.559575 | -2.460905 | -1.662093 |
| 1  | -3.028530 | -0.987364 | -2.507426 |
| 1  | -3.741479 | -0.873764 | -0.881021 |
| 15 | -1.697249 | 1.565989  | -0.208517 |
| 6  | -2.796246 | 1.983030  | -1.634635 |
| 1  | -3.305437 | 2.940477  | -1.468677 |
| 1  | -3.557630 | 1.212985  | -1.784063 |
| 1  | -2.196437 | 2.051420  | -2.548232 |
| 6  | -2.956732 | 1.449752  | 1.139603  |
| 1  | -3.722658 | 2.231498  | 1.062983  |
| 1  | -2.453649 | 1.544750  | 2.107743  |
| 1  | -3.447635 | 0.470799  | 1.108847  |
| 6  | -0.973009 | 3.255539  | 0.114028  |
| 1  | -0.808171 | 3.727998  | -0.862153 |
| 1  | -1.683807 | 3.883948  | 0.663101  |
| 6  | 0.356509  | 3.107929  | 0.850938  |
| 1  | 0.188294  | 2.832059  | 1.899532  |
| 1  | 0.941410  | 4.035391  | 0.837179  |
| 15 | 1.274263  | 1.713696  | 0.055300  |
| 6  | 1.885819  | 2.455055  | -1.504544 |
| 1  | 2.413999  | 3.399769  | -1.328454 |

|   |          |           |           |
|---|----------|-----------|-----------|
| 1 | 1.047097 | 2.626290  | -2.185788 |
| 1 | 2.569533 | 1.734780  | -1.965551 |
| 6 | 2.813558 | 1.636224  | 1.048606  |
| 1 | 3.360330 | 2.583318  | 0.975980  |
| 1 | 3.451931 | 0.832051  | 0.671671  |
| 1 | 2.578454 | 1.449121  | 2.100811  |
| 1 | 0.668099 | -0.201965 | -1.621304 |
| 6 | 3.520129 | -1.385249 | -1.468445 |
| 8 | 3.917351 | -0.240015 | -1.693258 |
| 8 | 2.307657 | -1.780485 | -1.310325 |
| 1 | 4.260877 | -2.207992 | -1.385433 |
| 1 | 1.401529 | -0.885351 | -1.286273 |

Co-Int1A

E= -2176.044138 a.u.

|    |           |           |           |
|----|-----------|-----------|-----------|
| 27 | -0.057653 | -0.075277 | -0.350483 |
| 15 | -1.039240 | 1.931004  | 0.174939  |
| 6  | -0.653277 | 3.161318  | 1.490080  |
| 1  | -1.365546 | 3.993621  | 1.446903  |
| 1  | 0.356862  | 3.560695  | 1.355358  |
| 1  | -0.717826 | 2.702119  | 2.479575  |
| 6  | -1.173716 | 3.045591  | -1.281992 |
| 1  | -1.749374 | 3.948601  | -1.047352 |
| 1  | -1.660031 | 2.512169  | -2.104275 |
| 1  | -0.176098 | 3.341538  | -1.622625 |
| 6  | -2.818912 | 1.567193  | 0.538525  |
| 1  | -2.877051 | 1.277806  | 1.595969  |
| 1  | -3.435368 | 2.464294  | 0.407206  |
| 6  | -3.296131 | 0.419687  | -0.352127 |
| 1  | -3.367633 | 0.751717  | -1.394922 |

|    |           |           |           |
|----|-----------|-----------|-----------|
| 1  | -4.287024 | 0.060598  | -0.050678 |
| 15 | -2.063343 | -0.963187 | -0.308135 |
| 6  | -2.612596 | -1.926132 | 1.153919  |
| 1  | -3.668534 | -2.205112 | 1.062699  |
| 1  | -2.478743 | -1.335718 | 2.065642  |
| 1  | -2.013542 | -2.837004 | 1.238383  |
| 6  | -2.632028 | -2.028298 | -1.681396 |
| 1  | -3.705835 | -2.229149 | -1.590989 |
| 1  | -2.083722 | -2.973989 | -1.668819 |
| 1  | -2.429548 | -1.533202 | -2.634338 |
| 15 | 1.944530  | 0.599864  | -0.914685 |
| 6  | 2.424116  | 0.694683  | -2.672348 |
| 1  | 3.501995  | 0.855082  | -2.785506 |
| 1  | 1.887146  | 1.522009  | -3.148298 |
| 1  | 2.122090  | -0.238449 | -3.155298 |
| 6  | 2.521571  | 2.220656  | -0.266697 |
| 1  | 3.570729  | 2.396949  | -0.530723 |
| 1  | 2.424196  | 2.240007  | 0.823164  |
| 1  | 1.916554  | 3.033788  | -0.679463 |
| 6  | 3.155555  | -0.564867 | -0.149573 |
| 1  | 3.113477  | -1.486210 | -0.736864 |
| 1  | 4.173686  | -0.163752 | -0.216977 |
| 6  | 2.762858  | -0.847269 | 1.308860  |
| 1  | 3.264924  | -0.141012 | 1.979939  |
| 1  | 3.081558  | -1.852020 | 1.601717  |
| 15 | 0.920931  | -0.688927 | 1.618697  |
| 6  | 0.505606  | -2.211234 | 2.554889  |
| 1  | 1.271055  | -2.405212 | 3.315392  |
| 1  | 0.451937  | -3.047010 | 1.856606  |
| 1  | -0.456251 | -2.086691 | 3.061128  |

|   |           |           |           |
|---|-----------|-----------|-----------|
| 6 | 0.915362  | 0.508550  | 3.021369  |
| 1 | 1.539680  | 0.143649  | 3.845611  |
| 1 | -0.106050 | 0.640277  | 3.394433  |
| 1 | 1.296138  | 1.482096  | 2.700110  |
| 1 | -0.510054 | 0.317569  | -1.702290 |
| 6 | 0.505346  | -1.831168 | -1.215595 |
| 8 | 0.804662  | -2.745283 | -0.406035 |
| 8 | 0.521229  | -1.893611 | -2.462351 |

#### Formate

E= -189.234019 a.u.

|   |          |           |           |
|---|----------|-----------|-----------|
| 6 | 0.000000 | 0.000000  | 0.325275  |
| 8 | 0.000000 | 1.132684  | -0.212743 |
| 8 | 0.000000 | -1.132684 | -0.212743 |
| 1 | 0.000000 | 0.000000  | 1.452233  |

#### Formic

E= -189.718249 a.u.

|   |           |           |          |
|---|-----------|-----------|----------|
| 6 | 0.000000  | 0.422969  | 0.000000 |
| 8 | 1.161194  | 0.090018  | 0.000000 |
| 8 | -1.031008 | -0.423290 | 0.000000 |
| 1 | -0.353750 | 1.461462  | 0.000000 |
| 1 | -0.687743 | -1.333100 | 0.000000 |

#### H2

E= -1.174756 a.u.

|   |          |          |           |
|---|----------|----------|-----------|
| 1 | 0.000000 | 0.000000 | 0.371730  |
| 1 | 0.000000 | 0.000000 | -0.371730 |

#### TS1



E= -2176.018343 a.u.

|    |           |           |           |
|----|-----------|-----------|-----------|
| 27 | -0.101193 | 0.041324  | 0.126805  |
| 1  | 0.830815  | 1.272283  | 0.409820  |
| 15 | 1.049484  | -0.205867 | -1.761060 |
| 6  | 0.571028  | -1.098811 | -3.306563 |
| 1  | 1.385770  | -1.097120 | -4.041083 |
| 1  | -0.305582 | -0.621261 | -3.758283 |
| 1  | 0.316458  | -2.137914 | -3.079155 |
| 6  | 1.799292  | 1.299657  | -2.524478 |
| 1  | 2.411479  | 1.051803  | -3.400398 |
| 1  | 2.433205  | 1.812565  | -1.794852 |
| 1  | 1.007524  | 1.992199  | -2.828805 |
| 6  | 2.578989  | -1.171702 | -1.291593 |
| 1  | 2.333723  | -2.235203 | -1.414340 |
| 1  | 3.410761  | -0.951327 | -1.972472 |
| 6  | 2.960087  | -0.889034 | 0.165121  |
| 1  | 3.327700  | 0.138177  | 0.269172  |
| 1  | 3.756546  | -1.561952 | 0.506834  |
| 15 | 1.455302  | -1.033604 | 1.255994  |
| 6  | 1.417799  | -2.860829 | 1.532385  |
| 1  | 2.418652  | -3.244187 | 1.763497  |
| 1  | 1.039642  | -3.377809 | 0.644623  |
| 1  | 0.759868  | -3.097826 | 2.374367  |
| 6  | 2.123878  | -0.498940 | 2.885470  |
| 1  | 3.051553  | -1.024440 | 3.143948  |
| 1  | 1.377132  | -0.696621 | 3.662465  |
| 1  | 2.315811  | 0.576941  | 2.861409  |
| 15 | -1.734981 | 1.471793  | 0.253114  |
| 6  | -1.907391 | 2.683867  | 1.629527  |
| 1  | -2.858894 | 3.226161  | 1.568952  |

|    |           |           |           |
|----|-----------|-----------|-----------|
| 1  | -1.088458 | 3.408143  | 1.593846  |
| 1  | -1.855175 | 2.154789  | 2.586575  |
| 6  | -1.960346 | 2.580260  | -1.204376 |
| 1  | -2.802954 | 3.271532  | -1.079062 |
| 1  | -2.127047 | 1.966688  | -2.096599 |
| 1  | -1.043409 | 3.157481  | -1.353040 |
| 6  | -3.377745 | 0.604575  | 0.329967  |
| 1  | -3.591570 | 0.405745  | 1.387763  |
| 1  | -4.184895 | 1.237349  | -0.057492 |
| 6  | -3.256855 | -0.711673 | -0.437455 |
| 1  | -3.216552 | -0.523089 | -1.517682 |
| 1  | -4.101997 | -1.384033 | -0.247091 |
| 15 | -1.649031 | -1.503709 | 0.040744  |
| 6  | -2.122576 | -2.364360 | 1.602367  |
| 1  | -3.088454 | -2.872121 | 1.496148  |
| 1  | -2.180572 | -1.642295 | 2.422052  |
| 1  | -1.366986 | -3.111913 | 1.859675  |
| 6  | -1.596802 | -2.936788 | -1.113341 |
| 1  | -2.426732 | -3.627236 | -0.922467 |
| 1  | -0.653372 | -3.481226 | -1.001670 |
| 1  | -1.671635 | -2.579331 | -2.144521 |
| 6  | 1.667451  | 2.728924  | 0.626060  |
| 8  | 1.007483  | 3.530209  | 0.051695  |
| 8  | 2.608445  | 2.389693  | 1.266268  |

TS2

E= -1987.990781 a.u.

|    |           |           |           |
|----|-----------|-----------|-----------|
| 27 | -0.000001 | 0.000001  | -0.506138 |
| 1  | -0.199443 | 0.500189  | -1.917547 |
| 1  | 0.199431  | -0.500148 | -1.917565 |

|    |           |           |           |
|----|-----------|-----------|-----------|
| 15 | -0.762508 | 1.768527  | 0.617870  |
| 6  | -0.431996 | 3.410145  | -0.135416 |
| 1  | -0.894517 | 4.217084  | 0.443981  |
| 1  | -0.836902 | 3.419435  | -1.152469 |
| 1  | 0.644067  | 3.595247  | -0.199621 |
| 6  | -0.366601 | 2.046519  | 2.387725  |
| 1  | -0.930701 | 2.895395  | 2.790817  |
| 1  | 0.701802  | 2.244062  | 2.514170  |
| 1  | -0.621097 | 1.146195  | 2.956533  |
| 6  | -2.621762 | 1.718926  | 0.640002  |
| 1  | -3.029108 | 2.735487  | 0.633307  |
| 1  | -2.930327 | 1.249806  | 1.581851  |
| 6  | -3.126505 | 0.896721  | -0.548130 |
| 1  | -4.194625 | 0.668041  | -0.460887 |
| 1  | -2.969438 | 1.435799  | -1.489645 |
| 6  | -2.862255 | -1.649425 | 0.715932  |
| 1  | -3.939570 | -1.757469 | 0.549343  |
| 1  | -2.700082 | -1.163500 | 1.682730  |
| 1  | -2.415513 | -2.646656 | 0.750540  |
| 6  | -2.641339 | -1.507191 | -2.138059 |
| 1  | -3.719350 | -1.699736 | -2.131892 |
| 1  | -2.105908 | -2.459101 | -2.215378 |
| 1  | -2.385569 | -0.897976 | -3.010427 |
| 15 | -2.114275 | -0.642618 | -0.619498 |
| 15 | 0.762512  | -1.768541 | 0.617854  |
| 6  | 0.366610  | -2.046587 | 2.387701  |
| 1  | 0.930646  | -2.895532 | 2.790737  |
| 1  | -0.701807 | -2.244043 | 2.514156  |
| 1  | 0.621202  | -1.146314 | 2.956549  |
| 6  | 0.432019  | -3.410151 | -0.135456 |

|    |           |           |           |
|----|-----------|-----------|-----------|
| 1  | 0.894928  | -4.217058 | 0.443675  |
| 1  | 0.836512  | -3.419257 | -1.152675 |
| 1  | -0.644037 | -3.595456 | -0.199223 |
| 6  | 2.621764  | -1.718915 | 0.639997  |
| 1  | 2.930313  | -1.249789 | 1.581849  |
| 1  | 3.029124  | -2.735470 | 0.633307  |
| 6  | 3.126511  | -0.896704 | -0.548128 |
| 1  | 2.969453  | -1.435780 | -1.489645 |
| 1  | 4.194629  | -0.668019 | -0.460874 |
| 6  | 2.862240  | 1.649453  | 0.715925  |
| 1  | 3.939556  | 1.757497  | 0.549345  |
| 1  | 2.700057  | 1.163545  | 1.682730  |
| 1  | 2.415498  | 2.646685  | 0.750511  |
| 6  | 2.641319  | 1.507209  | -2.138058 |
| 1  | 3.719325  | 1.699782  | -2.131888 |
| 1  | 2.105864  | 2.459108  | -2.215372 |
| 1  | 2.385565  | 0.897992  | -3.010429 |
| 15 | 2.114272  | 0.642627  | -0.619498 |

TS3

E= -3139.556748 a.u.

|    |           |           |           |
|----|-----------|-----------|-----------|
| 27 | -1.821083 | -0.033525 | 0.077112  |
| 1  | 0.154942  | -0.041893 | -0.162057 |
| 1  | -1.206697 | -0.670680 | 1.272222  |
| 15 | -1.585994 | -2.002519 | -0.882990 |
| 6  | -1.419602 | -2.302444 | -2.692885 |
| 1  | -1.367428 | -3.379188 | -2.891066 |
| 1  | -0.542560 | -1.822693 | -3.126701 |
| 1  | -2.308914 | -1.906311 | -3.192872 |
| 6  | -0.371073 | -3.184846 | -0.168146 |

|    |           |           |           |
|----|-----------|-----------|-----------|
| 1  | -0.395915 | -4.144221 | -0.696869 |
| 1  | -0.624992 | -3.355469 | 0.883649  |
| 1  | 0.643592  | -2.781362 | -0.213777 |
| 6  | -3.159670 | -2.956696 | -0.627961 |
| 1  | -3.870119 | -2.617606 | -1.392851 |
| 1  | -2.986639 | -4.027408 | -0.790363 |
| 6  | -3.707047 | -2.666367 | 0.760403  |
| 1  | -3.039477 | -3.079805 | 1.527132  |
| 1  | -4.698327 | -3.109316 | 0.913464  |
| 15 | -3.766326 | -0.830137 | 1.026006  |
| 6  | -5.499245 | -0.453532 | 0.504356  |
| 1  | -6.223694 | -1.042466 | 1.079889  |
| 1  | -5.637019 | -0.669853 | -0.559458 |
| 1  | -5.710562 | 0.609449  | 0.663300  |
| 6  | -4.013736 | -0.840634 | 2.856671  |
| 1  | -4.652662 | -1.685553 | 3.140204  |
| 1  | -4.497052 | 0.076987  | 3.200250  |
| 1  | -3.049672 | -0.942670 | 3.364734  |
| 15 | -1.680823 | 1.877159  | 1.189921  |
| 6  | -2.796597 | 2.174939  | 2.625199  |
| 1  | -2.688836 | 3.212064  | 2.964086  |
| 1  | -2.542417 | 1.509807  | 3.455037  |
| 1  | -3.839072 | 2.008949  | 2.341673  |
| 6  | -0.130331 | 2.563218  | 1.953244  |
| 1  | -0.260275 | 2.652960  | 3.036448  |
| 1  | 0.079975  | 3.561891  | 1.560572  |
| 1  | 0.730320  | 1.919052  | 1.771418  |
| 6  | -2.285351 | 3.255477  | 0.089746  |
| 1  | -3.371144 | 3.310417  | 0.238515  |
| 1  | -1.868060 | 4.218511  | 0.404480  |

|    |           |           |           |
|----|-----------|-----------|-----------|
| 6  | -1.981074 | 2.947357  | -1.370210 |
| 1  | -0.918479 | 3.096384  | -1.583969 |
| 1  | -2.546015 | 3.597560  | -2.049052 |
| 15 | -2.365203 | 1.167756  | -1.717776 |
| 6  | -4.141056 | 1.273599  | -2.203239 |
| 1  | -4.277658 | 1.936663  | -3.065738 |
| 1  | -4.734994 | 1.653318  | -1.366723 |
| 1  | -4.515149 | 0.277621  | -2.461871 |
| 6  | -1.624580 | 0.990047  | -3.395827 |
| 1  | -1.792390 | 1.907401  | -3.972042 |
| 1  | -2.087106 | 0.159574  | -3.935589 |
| 1  | -0.550327 | 0.805324  | -3.334679 |
| 7  | 2.156582  | -0.287928 | 1.620182  |
| 15 | 1.886315  | -0.106829 | -0.034035 |
| 6  | 3.198921  | 0.450279  | 2.328858  |
| 7  | 2.744202  | -1.372042 | -0.780892 |
| 7  | 2.609826  | 1.320364  | -0.562302 |
| 6  | 4.636473  | -0.031280 | 2.098395  |
| 6  | 3.846423  | -2.044305 | -0.087320 |
| 6  | 3.986603  | 1.361411  | -1.061996 |
| 7  | 5.070057  | -0.019717 | 0.723518  |
| 6  | 5.161261  | -1.262433 | -0.002017 |
| 6  | 5.080915  | 1.223759  | -0.003611 |
| 1  | 2.982167  | 0.399949  | 3.399646  |
| 1  | 3.135816  | 1.509189  | 2.051738  |
| 1  | 5.290792  | 0.611696  | 2.709899  |
| 1  | 4.752647  | -1.050294 | 2.483308  |
| 1  | 4.031820  | -3.001232 | -0.584403 |
| 1  | 3.532534  | -2.281240 | 0.926403  |
| 1  | 4.132840  | 2.315621  | -1.573150 |

|   |           |           |           |
|---|-----------|-----------|-----------|
| 1 | 4.134906  | 0.587693  | -1.823835 |
| 1 | 5.896511  | -1.930816 | 0.475363  |
| 1 | 5.545277  | -1.049758 | -1.006327 |
| 1 | 4.997993  | 2.043705  | 0.718176  |
| 1 | 6.044122  | 1.355964  | -0.524209 |
| 6 | 1.806153  | 2.544041  | -0.751072 |
| 1 | 0.811561  | 2.314303  | -0.363439 |
| 6 | 1.293823  | -1.214735 | 2.389246  |
| 1 | 0.528097  | -1.547226 | 1.687488  |
| 6 | 2.724446  | -1.618040 | -2.241614 |
| 1 | 3.760170  | -1.512355 | -2.596034 |
| 6 | 1.630724  | 2.931998  | -2.223205 |
| 1 | 1.064387  | 3.867568  | -2.291989 |
| 1 | 2.589668  | 3.100990  | -2.724498 |
| 1 | 1.084567  | 2.163857  | -2.775984 |
| 6 | 2.381157  | 3.717081  | 0.045260  |
| 1 | 2.515954  | 3.458747  | 1.099636  |
| 1 | 3.350732  | 4.031089  | -0.358482 |
| 1 | 1.708265  | 4.579833  | -0.013629 |
| 6 | 0.555355  | -0.529211 | 3.541493  |
| 1 | -0.175178 | -1.229967 | 3.961490  |
| 1 | 1.228386  | -0.233554 | 4.354509  |
| 1 | 0.012996  | 0.350626  | 3.196705  |
| 6 | 2.024351  | -2.455177 | 2.915793  |
| 1 | 2.322745  | -3.134437 | 2.113204  |
| 1 | 2.914178  | -2.182551 | 3.495182  |
| 1 | 1.358030  | -3.017295 | 3.579744  |
| 6 | 2.266903  | -3.041726 | -2.576458 |
| 1 | 2.454775  | -3.243887 | -3.637036 |
| 1 | 2.799184  | -3.801730 | -1.996647 |

|   |          |           |           |
|---|----------|-----------|-----------|
| 1 | 1.197240 | -3.165361 | -2.392797 |
| 6 | 1.873193 | -0.604938 | -3.002527 |
| 1 | 0.893874 | -0.482644 | -2.529840 |
| 1 | 2.351271 | 0.373770  | -3.062758 |
| 1 | 1.707522 | -0.959743 | -4.024739 |

TS4

E= -2176.504007 a.u.

|    |           |           |           |
|----|-----------|-----------|-----------|
| 27 | 0.045738  | 0.030865  | -0.374889 |
| 15 | -2.165497 | 0.165873  | -0.844986 |
| 6  | -3.006951 | 1.709338  | -1.333625 |
| 1  | -4.077518 | 1.505793  | -1.443706 |
| 1  | -2.618764 | 2.056420  | -2.295138 |
| 1  | -2.877123 | 2.494317  | -0.583743 |
| 6  | -2.631857 | -0.974062 | -2.190409 |
| 1  | -3.715070 | -0.933212 | -2.346576 |
| 1  | -2.330722 | -1.991536 | -1.932643 |
| 1  | -2.123843 | -0.676563 | -3.112581 |
| 6  | -3.115563 | -0.404701 | 0.625926  |
| 1  | -3.246429 | 0.461457  | 1.286521  |
| 1  | -4.112997 | -0.732876 | 0.313003  |
| 6  | -2.355875 | -1.517557 | 1.345210  |
| 1  | -2.326254 | -2.427519 | 0.739246  |
| 1  | -2.825713 | -1.757208 | 2.305486  |
| 15 | -0.607238 | -0.997378 | 1.624267  |
| 6  | -0.742592 | -0.013645 | 3.168815  |
| 1  | -1.030367 | -0.677348 | 3.991537  |
| 1  | -1.504333 | 0.764122  | 3.070596  |
| 1  | 0.214447  | 0.453537  | 3.419146  |
| 6  | 0.204628  | -2.508793 | 2.255241  |



|    |           |           |           |
|----|-----------|-----------|-----------|
| 1  | -0.488531 | -3.027081 | 2.927469  |
| 1  | 1.098870  | -2.244882 | 2.826925  |
| 1  | 0.467804  | -3.168599 | 1.427031  |
| 15 | 2.280649  | -0.168646 | -0.119682 |
| 6  | 3.058795  | -1.668810 | 0.557342  |
| 1  | 4.142587  | -1.601874 | 0.415073  |
| 1  | 2.685309  | -2.551658 | 0.031888  |
| 1  | 2.847471  | -1.763367 | 1.624018  |
| 6  | 3.164708  | 0.115071  | -1.687829 |
| 1  | 4.247671  | 0.127879  | -1.526111 |
| 1  | 2.847377  | 1.061406  | -2.133851 |
| 1  | 2.911124  | -0.699131 | -2.374476 |
| 6  | 2.778121  | 1.204548  | 0.989014  |
| 1  | 2.440425  | 0.950485  | 2.000043  |
| 1  | 3.867081  | 1.315995  | 1.012236  |
| 6  | 2.100230  | 2.476116  | 0.484535  |
| 1  | 2.592440  | 2.831755  | -0.427202 |
| 1  | 2.146039  | 3.286815  | 1.219251  |
| 15 | 0.327425  | 2.164898  | 0.052054  |
| 6  | -0.636859 | 2.871944  | 1.430239  |
| 1  | -0.556502 | 3.963851  | 1.394059  |
| 1  | -0.241641 | 2.523242  | 2.385556  |
| 1  | -1.690807 | 2.592670  | 1.347723  |
| 6  | 0.044736  | 3.353005  | -1.303218 |
| 1  | 0.467922  | 4.319491  | -1.008077 |
| 1  | -1.020294 | 3.488791  | -1.498904 |
| 1  | 0.535490  | 3.006361  | -2.216062 |
| 1  | 0.314508  | 0.643719  | -1.683225 |
| 1  | 0.199620  | -1.241198 | -2.019998 |
| 6  | 0.423548  | -2.306740 | -1.655291 |

|   |           |           |           |
|---|-----------|-----------|-----------|
| 8 | 1.403783  | -2.841838 | -2.192151 |
| 8 | -0.368120 | -2.742273 | -0.783226 |

TS6

E= -3139.561928 a.u.

|    |           |           |           |
|----|-----------|-----------|-----------|
| 27 | 2.179075  | 0.021412  | 0.040393  |
| 1  | 0.520372  | -0.148435 | 0.066055  |
| 1  | -0.528793 | 0.009313  | 0.179751  |
| 15 | 2.290676  | 1.591193  | 1.610927  |
| 6  | 1.762769  | 1.381007  | 3.363427  |
| 1  | 1.572826  | 2.355761  | 3.828013  |
| 1  | 2.542283  | 0.873733  | 3.938891  |
| 1  | 0.849155  | 0.781113  | 3.413073  |
| 6  | 3.815007  | 2.601805  | 1.864460  |
| 1  | 3.642392  | 3.453625  | 2.533932  |
| 1  | 4.179921  | 2.973404  | 0.900648  |
| 1  | 4.599545  | 1.967417  | 2.291816  |
| 6  | 1.075591  | 2.882272  | 1.058002  |
| 1  | 0.086359  | 2.425870  | 1.168854  |
| 1  | 1.107371  | 3.772923  | 1.697165  |
| 6  | 1.339940  | 3.230364  | -0.404578 |
| 1  | 2.169256  | 3.943984  | -0.469736 |
| 1  | 0.477779  | 3.706272  | -0.883952 |
| 15 | 1.855917  | 1.706673  | -1.353937 |
| 6  | 0.583003  | 1.476295  | -2.660891 |
| 1  | 0.336487  | 2.425582  | -3.149354 |
| 1  | -0.322994 | 1.027737  | -2.248527 |
| 1  | 0.979748  | 0.787687  | -3.414709 |
| 6  | 3.196481  | 2.453672  | -2.372696 |
| 1  | 2.815731  | 3.347468  | -2.880362 |

|    |           |           |           |
|----|-----------|-----------|-----------|
| 1  | 3.567061  | 1.759657  | -3.131222 |
| 1  | 4.030857  | 2.747162  | -1.728388 |
| 15 | 3.637809  | -0.914536 | -1.303573 |
| 6  | 3.310022  | -1.246305 | -3.088942 |
| 1  | 4.137974  | -1.801965 | -3.544956 |
| 1  | 3.171922  | -0.314503 | -3.645249 |
| 1  | 2.391899  | -1.835037 | -3.182593 |
| 6  | 5.323637  | -0.162599 | -1.398764 |
| 1  | 5.992024  | -0.761160 | -2.029448 |
| 1  | 5.741484  | -0.102834 | -0.388013 |
| 1  | 5.277357  | 0.852367  | -1.800531 |
| 6  | 4.082493  | -2.624016 | -0.729024 |
| 1  | 3.349366  | -3.322519 | -1.150800 |
| 1  | 5.069241  | -2.915718 | -1.105911 |
| 6  | 4.011784  | -2.639466 | 0.794288  |
| 1  | 4.837021  | -2.059564 | 1.225203  |
| 1  | 4.062810  | -3.654202 | 1.205664  |
| 15 | 2.428879  | -1.806937 | 1.268951  |
| 6  | 1.229999  | -3.166911 | 0.948104  |
| 1  | 1.557695  | -4.098999 | 1.423076  |
| 1  | 1.130566  | -3.327355 | -0.129281 |
| 1  | 0.248773  | -2.898883 | 1.345240  |
| 6  | 2.539860  | -1.870854 | 3.101690  |
| 1  | 2.715800  | -2.901401 | 3.430057  |
| 1  | 1.618936  | -1.508873 | 3.565498  |
| 1  | 3.372566  | -1.247875 | 3.442450  |
| 7  | -2.443849 | -1.100832 | -1.208734 |
| 15 | -2.231261 | -0.070762 | 0.103812  |
| 6  | -3.502804 | -0.925616 | -2.192047 |
| 7  | -2.965991 | -0.768719 | 1.448056  |

|   |           |           |           |
|---|-----------|-----------|-----------|
| 7 | -3.039737 | 1.369430  | -0.191430 |
| 6 | -4.879398 | -1.351159 | -1.666991 |
| 6 | -3.948287 | -1.842374 | 1.312619  |
| 6 | -4.418554 | 1.593857  | 0.243477  |
| 7 | -5.236203 | -0.653040 | -0.457652 |
| 6 | -5.309044 | -1.352960 | 0.799889  |
| 6 | -5.466444 | 0.767764  | -0.506454 |
| 1 | -3.244568 | -1.487378 | -3.095319 |
| 1 | -3.550096 | 0.128686  | -2.486025 |
| 1 | -5.625991 | -1.179726 | -2.460117 |
| 1 | -4.877614 | -2.425504 | -1.455919 |
| 1 | -4.074569 | -2.316291 | 2.291653  |
| 1 | -3.573776 | -2.616814 | 0.637039  |
| 1 | -4.651712 | 2.652538  | 0.105809  |
| 1 | -4.509767 | 1.386210  | 1.316924  |
| 1 | -5.978983 | -2.225749 | 0.728409  |
| 1 | -5.746939 | -0.674170 | 1.540833  |
| 1 | -5.483460 | 1.074707  | -1.558018 |
| 1 | -6.451584 | 1.024150  | -0.082048 |
| 6 | -2.264630 | 2.524940  | -0.673650 |
| 1 | -1.230259 | 2.176123  | -0.737832 |
| 6 | -1.524390 | -2.250808 | -1.328350 |
| 1 | -1.032684 | -2.348143 | -0.354538 |
| 6 | -2.439507 | -0.491685 | 2.799380  |
| 1 | -3.246261 | -0.762998 | 3.489147  |
| 6 | -2.281068 | 3.703431  | 0.304577  |
| 1 | -1.529766 | 4.441113  | 0.002995  |
| 1 | -3.249378 | 4.215164  | 0.318396  |
| 1 | -2.050068 | 3.376715  | 1.322838  |
| 6 | -2.705039 | 2.958628  | -2.071424 |

|   |           |           |           |
|---|-----------|-----------|-----------|
| 1 | -2.568885 | 2.150355  | -2.797194 |
| 1 | -3.762921 | 3.248325  | -2.073984 |
| 1 | -2.122713 | 3.824147  | -2.408090 |
| 6 | -0.437980 | -2.004224 | -2.377412 |
| 1 | 0.165307  | -2.909016 | -2.519489 |
| 1 | -0.879496 | -1.738400 | -3.345656 |
| 1 | 0.228313  | -1.201501 | -2.052548 |
| 6 | -2.241255 | -3.577016 | -1.601710 |
| 1 | -3.014071 | -3.794667 | -0.859701 |
| 1 | -2.704211 | -3.592802 | -2.594602 |
| 1 | -1.508460 | -4.390413 | -1.570398 |
| 6 | -1.216777 | -1.355178 | 3.107347  |
| 1 | -0.893544 | -1.226293 | 4.147054  |
| 1 | -1.435448 | -2.416690 | 2.945963  |
| 1 | -0.388979 | -1.065213 | 2.449786  |
| 6 | -2.127052 | 0.985740  | 3.033307  |
| 1 | -1.291979 | 1.326534  | 2.411849  |
| 1 | -2.995348 | 1.619224  | 2.830852  |
| 1 | -1.835882 | 1.133942  | 4.078793  |

TS7

E= -2177.227317 a.u.

|    |           |           |           |
|----|-----------|-----------|-----------|
| 27 | 0.064621  | -0.008231 | -0.212390 |
| 1  | -0.001769 | 0.477130  | -1.627999 |
| 15 | 2.129135  | -0.761231 | -0.688368 |
| 6  | 2.455558  | -1.146025 | -2.460864 |
| 1  | 3.524319  | -1.298993 | -2.654210 |
| 1  | 2.090352  | -0.325853 | -3.086335 |
| 1  | 1.915494  | -2.053427 | -2.750224 |
| 6  | 3.082044  | -2.126687 | 0.107089  |

|    |           |           |           |
|----|-----------|-----------|-----------|
| 1  | 4.078285  | -2.236358 | -0.338834 |
| 1  | 2.543809  | -3.074138 | -0.008115 |
| 1  | 3.201378  | -1.929379 | 1.176576  |
| 6  | 3.277732  | 0.675348  | -0.407633 |
| 1  | 4.207523  | 0.562395  | -0.978341 |
| 1  | 3.543333  | 0.668395  | 0.658083  |
| 6  | 2.555436  | 1.978895  | -0.755770 |
| 1  | 3.134425  | 2.857920  | -0.447965 |
| 1  | 2.397982  | 2.049271  | -1.839245 |
| 6  | 1.251384  | 2.667705  | 1.702609  |
| 1  | 1.863338  | 3.574421  | 1.630227  |
| 1  | 1.784041  | 1.927619  | 2.309035  |
| 1  | 0.317571  | 2.924728  | 2.212271  |
| 6  | 0.098649  | 3.448551  | -0.747930 |
| 1  | 0.758711  | 4.322060  | -0.688461 |
| 1  | -0.843679 | 3.684144  | -0.244972 |
| 1  | -0.123333 | 3.228370  | -1.795464 |
| 15 | 0.873262  | 1.983294  | 0.034837  |
| 15 | -0.335375 | -0.651671 | 1.863626  |
| 6  | 0.989020  | -1.251089 | 2.994080  |
| 1  | 0.583086  | -1.511144 | 3.978770  |
| 1  | 1.749906  | -0.473523 | 3.121975  |
| 1  | 1.467972  | -2.137510 | 2.568332  |
| 6  | -1.243961 | 0.466705  | 3.007729  |
| 1  | -1.611639 | -0.083877 | 3.881427  |
| 1  | -2.079902 | 0.931623  | 2.479203  |
| 1  | -0.573812 | 1.257579  | 3.357724  |
| 6  | -1.452454 | -2.138066 | 1.793653  |
| 1  | -0.808311 | -3.020082 | 1.685360  |
| 1  | -2.010157 | -2.252936 | 2.730244  |

|    |           |           |           |
|----|-----------|-----------|-----------|
| 6  | -2.378149 | -2.019323 | 0.581861  |
| 1  | -3.123174 | -1.231141 | 0.743364  |
| 1  | -2.913032 | -2.955815 | 0.383861  |
| 6  | -0.690585 | -3.123709 | -1.455793 |
| 1  | -1.494184 | -3.852614 | -1.615298 |
| 1  | 0.019758  | -3.527544 | -0.726883 |
| 1  | -0.161849 | -2.978400 | -2.403308 |
| 6  | -2.581190 | -1.152006 | -2.171538 |
| 1  | -3.316617 | -1.960889 | -2.252469 |
| 1  | -2.065892 | -1.042091 | -3.131623 |
| 1  | -3.087986 | -0.207203 | -1.959015 |
| 15 | -1.345826 | -1.503929 | -0.867137 |
| 6  | -3.181797 | 2.162258  | -0.634537 |
| 8  | -2.982750 | 2.230880  | -1.846025 |
| 8  | -2.536411 | 1.474545  | 0.243554  |
| 1  | -4.016080 | 2.743779  | -0.186492 |
| 1  | -1.449394 | 0.870050  | -0.089030 |

TS8

E= -1341.31641 a.u.

|    |           |           |           |
|----|-----------|-----------|-----------|
| 6  | 1.782495  | 1.989776  | 0.016063  |
| 6  | 1.741390  | 3.263665  | -0.829343 |
| 6  | 2.562444  | 2.197938  | 1.316612  |
| 7  | 0.435042  | 1.446414  | 0.264727  |
| 15 | 0.233405  | -0.200459 | -0.010759 |
| 6  | -0.541758 | 2.256738  | 0.978379  |
| 7  | -0.320797 | -0.358429 | -1.590620 |
| 7  | -0.941840 | -0.780107 | 1.040090  |
| 6  | -1.794052 | 2.561433  | 0.150259  |
| 6  | -0.105065 | -1.574039 | -2.402091 |

|   |           |           |           |
|---|-----------|-----------|-----------|
| 6 | -1.002693 | 0.744569  | -2.267107 |
| 6 | -0.482827 | -1.357189 | 2.316452  |
| 6 | -2.350617 | -0.886317 | 0.681302  |
| 7 | -2.454733 | 1.377876  | -0.339825 |
| 6 | 0.941982  | -2.516837 | -1.817629 |
| 6 | -1.410715 | -2.327326 | -2.671408 |
| 6 | -2.410555 | 1.057136  | -1.744334 |
| 6 | -0.613930 | -2.882263 | 2.326614  |
| 6 | -1.179933 | -0.725103 | 3.522694  |
| 6 | -3.068953 | 0.463362  | 0.589283  |
| 1 | 2.316232  | 1.230757  | -0.567427 |
| 1 | 1.235411  | 3.087342  | -1.783863 |
| 1 | 2.761467  | 3.601354  | -1.043616 |
| 1 | 1.225864  | 4.081253  | -0.311425 |
| 1 | 2.596592  | 1.268319  | 1.895063  |
| 1 | 3.592392  | 2.503617  | 1.099747  |
| 1 | 2.106633  | 2.975795  | 1.941251  |
| 1 | -0.067654 | 3.196385  | 1.277167  |
| 1 | -0.844506 | 1.753468  | 1.904693  |
| 1 | -2.476692 | 3.165383  | 0.771063  |
| 1 | -1.515878 | 3.178558  | -0.711768 |
| 1 | 0.284168  | -1.224702 | -3.368217 |
| 1 | -1.061903 | 0.499753  | -3.333124 |
| 1 | -0.393985 | 1.651659  | -2.185035 |
| 1 | 0.584268  | -1.118661 | 2.396175  |
| 1 | -2.855567 | -1.514440 | 1.420900  |
| 1 | -2.450437 | -1.400521 | -0.280756 |
| 1 | 1.073673  | -3.358509 | -2.506013 |
| 1 | 1.910861  | -2.024214 | -1.695951 |
| 1 | 0.630317  | -2.929601 | -0.850500 |



|   |           |           |           |
|---|-----------|-----------|-----------|
| 1 | -1.241719 | -3.118641 | -3.411161 |
| 1 | -2.186645 | -1.663105 | -3.066593 |
| 1 | -1.788393 | -2.796997 | -1.756184 |
| 1 | -2.809280 | 1.888901  | -2.349274 |
| 1 | -3.067301 | 0.197301  | -1.916893 |
| 1 | -0.184188 | -3.297011 | 3.245333  |
| 1 | -0.085244 | -3.320037 | 1.473115  |
| 1 | -1.663580 | -3.195926 | 2.278564  |
| 1 | -0.780449 | -1.150993 | 4.449825  |
| 1 | -1.019619 | 0.357282  | 3.549866  |
| 1 | -2.259577 | -0.914695 | 3.511171  |
| 1 | -3.077709 | 0.937474  | 1.576792  |
| 1 | -4.120212 | 0.268264  | 0.317521  |
| 6 | 3.828498  | -1.146594 | 0.180952  |
| 8 | 3.906141  | -0.570605 | -0.906656 |
| 8 | 2.756521  | -1.418111 | 0.839125  |
| 1 | 4.754347  | -1.489519 | 0.685018  |
| 1 | 1.677970  | -0.922652 | 0.345380  |

TSA

E= -2176.023101 a.u.

|    |           |           |           |
|----|-----------|-----------|-----------|
| 27 | -0.002506 | -0.027698 | -0.291654 |
| 15 | -1.273633 | 1.754269  | -0.541772 |
| 6  | -1.105380 | 3.440245  | 0.200845  |
| 1  | -1.978714 | 4.068199  | -0.015477 |
| 1  | -0.217860 | 3.930861  | -0.215097 |
| 1  | -0.979328 | 3.387930  | 1.285934  |
| 6  | -1.657954 | 2.267904  | -2.272996 |
| 1  | -2.436616 | 3.039687  | -2.312151 |
| 1  | -1.984991 | 1.397483  | -2.850102 |

|    |           |           |           |
|----|-----------|-----------|-----------|
| 1  | -0.750927 | 2.657864  | -2.747221 |
| 6  | -2.959015 | 1.243384  | 0.059749  |
| 1  | -2.936667 | 1.285265  | 1.156975  |
| 1  | -3.739212 | 1.935847  | -0.281717 |
| 6  | -3.233570 | -0.185700 | -0.415814 |
| 1  | -3.400335 | -0.186462 | -1.501051 |
| 1  | -4.135866 | -0.602318 | 0.048713  |
| 15 | -1.757387 | -1.300259 | -0.105957 |
| 6  | -2.246111 | -2.096513 | 1.489181  |
| 1  | -3.231124 | -2.572851 | 1.414694  |
| 1  | -2.277774 | -1.353823 | 2.291966  |
| 1  | -1.510018 | -2.860580 | 1.759692  |
| 6  | -2.206970 | -2.677413 | -1.250310 |
| 1  | -3.276044 | -2.913185 | -1.176240 |
| 1  | -1.640168 | -3.582046 | -1.005677 |
| 1  | -1.973602 | -2.395772 | -2.281132 |
| 15 | 2.040074  | 0.481377  | -0.815319 |
| 6  | 3.266350  | -0.521715 | -1.766747 |
| 1  | 4.219236  | 0.012465  | -1.867517 |
| 1  | 2.871742  | -0.730500 | -2.765893 |
| 1  | 3.457538  | -1.477176 | -1.267699 |
| 6  | 2.207697  | 2.064930  | -1.754080 |
| 1  | 3.256553  | 2.326933  | -1.939553 |
| 1  | 1.731874  | 2.876244  | -1.193241 |
| 1  | 1.694088  | 1.967638  | -2.716375 |
| 6  | 3.025525  | 0.857393  | 0.723593  |
| 1  | 3.520561  | -0.072697 | 1.030779  |
| 1  | 3.812464  | 1.594410  | 0.522992  |
| 6  | 2.070407  | 1.326411  | 1.822634  |
| 1  | 1.707177  | 2.339094  | 1.605633  |

|    |           |           |           |
|----|-----------|-----------|-----------|
| 1  | 2.555241  | 1.347752  | 2.806345  |
| 15 | 0.586345  | 0.212192  | 1.817200  |
| 6  | 1.194764  | -1.218609 | 2.805681  |
| 1  | 1.545041  | -0.896454 | 3.793940  |
| 1  | 2.009913  | -1.718878 | 2.277838  |
| 1  | 0.389198  | -1.947638 | 2.936305  |
| 6  | -0.485209 | 1.003798  | 3.093257  |
| 1  | 0.083755  | 1.219334  | 4.005429  |
| 1  | -1.311350 | 0.335300  | 3.356041  |
| 1  | -0.911236 | 1.937770  | 2.719481  |
| 1  | -0.193488 | -0.271469 | -1.757587 |
| 6  | 1.078237  | -2.754693 | -0.833850 |
| 8  | 1.348658  | -3.106939 | 0.259339  |
| 8  | 0.960713  | -2.773137 | -2.004780 |

TSB

E= -2176.032813 a.u.

|    |           |           |           |
|----|-----------|-----------|-----------|
| 27 | -0.018968 | -0.073542 | -0.402813 |
| 15 | -0.709607 | 2.014337  | 0.145718  |
| 6  | 0.115760  | 3.133756  | 1.361059  |
| 1  | -0.631342 | 3.795452  | 1.814468  |
| 1  | 0.864732  | 3.760860  | 0.872285  |
| 1  | 0.603954  | 2.561733  | 2.155863  |
| 6  | -1.091105 | 3.219305  | -1.193143 |
| 1  | -1.526642 | 4.146469  | -0.801692 |
| 1  | -1.786746 | 2.767075  | -1.907331 |
| 1  | -0.169658 | 3.457782  | -1.735323 |
| 6  | -2.351205 | 1.825841  | 0.979511  |
| 1  | -2.156101 | 1.391008  | 1.967882  |
| 1  | -2.824531 | 2.803446  | 1.131838  |

|    |           |           |           |
|----|-----------|-----------|-----------|
| 6  | -3.218999 | 0.894430  | 0.143131  |
| 1  | -3.557874 | 1.413215  | -0.761737 |
| 1  | -4.115835 | 0.570536  | 0.682895  |
| 15 | -2.214293 | -0.574498 | -0.400458 |
| 6  | -2.847035 | -1.904584 | 0.691270  |
| 1  | -3.928153 | -2.029850 | 0.563748  |
| 1  | -2.643305 | -1.658344 | 1.738414  |
| 1  | -2.341469 | -2.837261 | 0.433366  |
| 6  | -3.030383 | -0.938658 | -2.000153 |
| 1  | -4.117018 | -0.999576 | -1.868618 |
| 1  | -2.649731 | -1.880933 | -2.396039 |
| 1  | -2.800833 | -0.137853 | -2.710180 |
| 15 | 2.123312  | 0.502399  | -0.746437 |
| 6  | 2.856664  | 0.332007  | -2.414904 |
| 1  | 3.944841  | 0.456985  | -2.373431 |
| 1  | 2.437129  | 1.108435  | -3.064143 |
| 1  | 2.608062  | -0.650610 | -2.816406 |
| 6  | 2.756949  | 2.177803  | -0.321619 |
| 1  | 3.820374  | 2.240009  | -0.579111 |
| 1  | 2.651015  | 2.374909  | 0.747769  |
| 1  | 2.222027  | 2.952339  | -0.879982 |
| 6  | 3.147199  | -0.536746 | 0.390868  |
| 1  | 3.188871  | -1.537259 | -0.047776 |
| 1  | 4.167334  | -0.142599 | 0.469311  |
| 6  | 2.452617  | -0.568983 | 1.756895  |
| 1  | 2.517964  | 0.415240  | 2.239446  |
| 1  | 2.926544  | -1.291844 | 2.431286  |
| 15 | 0.646084  | -0.962188 | 1.547383  |
| 6  | 0.634649  | -2.791012 | 1.728329  |
| 1  | 1.113142  | -3.099407 | 2.665489  |

|   |           |           |           |
|---|-----------|-----------|-----------|
| 1 | 1.161773  | -3.240273 | 0.881856  |
| 1 | -0.394827 | -3.159830 | 1.714126  |
| 6 | -0.035157 | -0.464782 | 3.184466  |
| 1 | 0.544690  | -0.900726 | 4.006698  |
| 1 | -1.070937 | -0.808976 | 3.275053  |
| 1 | -0.025621 | 0.624715  | 3.288164  |
| 1 | -0.033625 | -0.540031 | -1.858247 |
| 6 | 0.316292  | -1.938242 | -1.385130 |
| 8 | -0.680898 | -2.685519 | -1.390654 |
| 8 | 1.505150  | -2.224575 | -1.624417 |

VKDH-formate

E= -1341.341835 a.u.

|    |           |           |           |
|----|-----------|-----------|-----------|
| 6  | -0.421439 | -1.949213 | -1.650473 |
| 6  | -0.264850 | -3.462552 | -1.799847 |
| 6  | -1.811374 | -1.476571 | -2.086649 |
| 7  | -0.085720 | -1.510946 | -0.285311 |
| 15 | 0.702836  | -0.032014 | -0.071263 |
| 6  | -0.892048 | -2.062866 | 0.795468  |
| 7  | 2.231979  | -0.011334 | 0.651485  |
| 7  | -0.140384 | 1.416114  | -0.264670 |
| 6  | -0.351880 | -1.471502 | 2.085769  |
| 6  | 3.440514  | -0.413443 | -0.101959 |
| 6  | 2.351576  | -0.055809 | 2.097616  |
| 6  | 0.231368  | 2.342579  | -1.345225 |
| 6  | -0.926603 | 1.957322  | 0.833243  |
| 7  | -0.029755 | -0.058503 | 1.795563  |
| 6  | 3.323416  | -1.803975 | -0.734408 |
| 6  | 3.879931  | 0.649302  | -1.109942 |
| 6  | 1.043687  | 0.474555  | 2.658895  |

|   |           |           |           |
|---|-----------|-----------|-----------|
| 6 | 1.168298  | 3.450319  | -0.854087 |
| 6 | -1.000922 | 2.916409  | -2.044396 |
| 6 | -1.233086 | 0.802717  | 1.768965  |
| 1 | 0.315882  | -1.481646 | -2.312352 |
| 1 | 0.713325  | -3.793326 | -1.433937 |
| 1 | -0.349631 | -3.738616 | -2.856374 |
| 1 | -1.043730 | -4.008091 | -1.255297 |
| 1 | -1.910542 | -0.393580 | -1.956038 |
| 1 | -1.977935 | -1.715013 | -3.143307 |
| 1 | -2.602280 | -1.959449 | -1.502847 |
| 1 | -0.784705 | -3.151171 | 0.833617  |
| 1 | -1.956206 | -1.825358 | 0.672802  |
| 1 | -1.071644 | -1.529853 | 2.906392  |
| 1 | 0.569335  | -1.977105 | 2.382979  |
| 1 | 4.227301  | -0.474634 | 0.657504  |
| 1 | 3.175760  | 0.583568  | 2.430786  |
| 1 | 2.559985  | -1.075165 | 2.454607  |
| 1 | 0.777299  | 1.748804  | -2.085805 |
| 1 | -1.878123 | 2.350813  | 0.467225  |
| 1 | -0.388277 | 2.764425  | 1.349762  |
| 1 | 4.300571  | -2.127333 | -1.110239 |
| 1 | 2.979814  | -2.537346 | 0.002967  |
| 1 | 2.623612  | -1.811481 | -1.577045 |
| 1 | 4.838779  | 0.364492  | -1.557480 |
| 1 | 4.007370  | 1.618941  | -0.617908 |
| 1 | 3.155914  | 0.768196  | -1.923355 |
| 1 | 0.873245  | 0.182763  | 3.698577  |
| 1 | 1.022018  | 1.564022  | 2.588382  |
| 1 | 1.541635  | 4.032928  | -1.703425 |
| 1 | 2.027446  | 3.025084  | -0.323824 |

|   |           |           |           |
|---|-----------|-----------|-----------|
| 1 | 0.653102  | 4.142658  | -0.178702 |
| 1 | -0.692088 | 3.480142  | -2.931491 |
| 1 | -1.678024 | 2.116724  | -2.361128 |
| 1 | -1.559356 | 3.600458  | -1.396408 |
| 1 | -2.076901 | 0.223268  | 1.385249  |
| 1 | -1.470505 | 1.136274  | 2.782956  |
| 6 | -4.297220 | -0.011497 | -0.035069 |
| 8 | -4.097214 | 1.223229  | 0.040559  |
| 8 | -4.051684 | -0.897627 | 0.822378  |
| 1 | -4.759010 | -0.375400 | -0.991335 |
| 1 | 1.216167  | -0.015566 | -1.376939 |

VKD-H

E= -1152.083652 a.u.

|    |           |           |           |
|----|-----------|-----------|-----------|
| 6  | -2.585685 | 0.275545  | -1.294214 |
| 6  | -3.603865 | -0.815325 | -1.625633 |
| 6  | -3.246989 | 1.636422  | -1.077295 |
| 7  | -1.746274 | -0.113930 | -0.147317 |
| 15 | -0.072020 | -0.102994 | -0.273104 |
| 6  | -2.372114 | -0.174835 | 1.163108  |
| 7  | 0.648872  | -1.573841 | -0.683672 |
| 7  | 0.868023  | 1.109776  | 0.410248  |
| 6  | -1.566546 | -1.163345 | 1.983038  |
| 6  | 1.828755  | -1.647314 | -1.579516 |
| 6  | 0.518204  | -2.664762 | 0.275520  |
| 6  | 1.082897  | 2.390679  | -0.284333 |
| 6  | 1.435341  | 0.930796  | 1.736505  |
| 7  | -0.146448 | -0.874034 | 1.704477  |
| 6  | 1.734343  | -0.742756 | -2.807339 |
| 6  | 3.140730  | -1.410325 | -0.825971 |

|   |           |           |           |
|---|-----------|-----------|-----------|
| 6 | 0.684707  | -2.091935 | 1.675379  |
| 6 | 2.571472  | 2.694549  | -0.448354 |
| 6 | 0.336620  | 3.533291  | 0.406974  |
| 6 | 0.399514  | 0.191383  | 2.565223  |
| 1 | -1.914553 | 0.360614  | -2.154447 |
| 1 | -3.103268 | -1.778845 | -1.766747 |
| 1 | -4.133096 | -0.562361 | -2.550656 |
| 1 | -4.357576 | -0.927195 | -0.837729 |
| 1 | -2.496132 | 2.401358  | -0.849875 |
| 1 | -3.784651 | 1.941989  | -1.981183 |
| 1 | -3.970971 | 1.606053  | -0.254821 |
| 1 | -3.402604 | -0.526279 | 1.074565  |
| 1 | -2.397670 | 0.812880  | 1.644109  |
| 1 | -1.766970 | -1.093485 | 3.055903  |
| 1 | -1.783915 | -2.179087 | 1.648034  |
| 1 | 1.827208  | -2.678903 | -1.949624 |
| 1 | 1.276505  | -3.426428 | 0.082954  |
| 1 | -0.462443 | -3.144386 | 0.166652  |
| 1 | 0.653156  | 2.275486  | -1.285367 |
| 1 | 1.647563  | 1.897028  | 2.198737  |
| 1 | 2.382331  | 0.376141  | 1.690608  |
| 1 | 2.523372  | -1.031874 | -3.508961 |
| 1 | 0.771039  | -0.854078 | -3.316153 |
| 1 | 1.887419  | 0.314536  | -2.564119 |
| 1 | 3.994541  | -1.549684 | -1.498286 |
| 1 | 3.257580  | -2.111748 | 0.007573  |
| 1 | 3.180486  | -0.389751 | -0.429239 |
| 1 | 0.378412  | -2.783943 | 2.465460  |
| 1 | 1.726532  | -1.806959 | 1.837825  |
| 1 | 2.703140  | 3.620928  | -1.017338 |



|   |           |           |           |
|---|-----------|-----------|-----------|
| 1 | 3.080310  | 1.886416  | -0.984393 |
| 1 | 3.063135  | 2.829680  | 0.521981  |
| 1 | 0.423060  | 4.452639  | -0.182113 |
| 1 | -0.726569 | 3.293090  | 0.516580  |
| 1 | 0.746061  | 3.742291  | 1.402127  |
| 1 | -0.414410 | 0.874222  | 2.821444  |
| 1 | 0.811206  | -0.233786 | 3.485332  |
| 1 | -0.051432 | 0.450145  | -1.556978 |

VKD

E= -1151.586015 a.u.

|    |           |           |           |
|----|-----------|-----------|-----------|
| 6  | -2.624303 | -0.321392 | -1.320664 |
| 6  | -3.688044 | -1.292949 | -0.803570 |
| 6  | -3.254154 | 0.960675  | -1.877494 |
| 7  | -1.589413 | -0.060735 | -0.310990 |
| 15 | 0.017133  | 0.005987  | -0.929017 |
| 6  | -1.991605 | 0.632074  | 0.902240  |
| 7  | 0.677374  | -1.466978 | -0.345349 |
| 7  | 0.767354  | 1.215471  | 0.032830  |
| 6  | -1.655570 | -0.109859 | 2.201682  |
| 6  | 1.756963  | -2.169504 | -1.058006 |
| 6  | 0.045150  | -2.236933 | 0.718662  |
| 6  | 0.988903  | 2.506226  | -0.630381 |
| 6  | 1.526231  | 0.926280  | 1.237350  |
| 7  | -0.258702 | -0.395858 | 2.431794  |
| 6  | 2.110977  | -1.567321 | -2.416249 |
| 6  | 3.022579  | -2.280467 | -0.198582 |
| 6  | 0.240725  | -1.721833 | 2.151399  |
| 6  | 2.412494  | 2.654648  | -1.180334 |
| 6  | 0.610015  | 3.688164  | 0.265912  |

|   |           |           |           |
|---|-----------|-----------|-----------|
| 6 | 0.679118  | 0.700797  | 2.495169  |
| 1 | -2.111596 | -0.820565 | -2.152846 |
| 1 | -3.226749 | -2.223795 | -0.456979 |
| 1 | -4.401895 | -1.537930 | -1.598632 |
| 1 | -4.257936 | -0.863528 | 0.028992  |
| 1 | -2.478264 | 1.626227  | -2.273383 |
| 1 | -3.954568 | 0.729611  | -2.688608 |
| 1 | -3.808616 | 1.505998  | -1.104492 |
| 1 | -3.075575 | 0.788292  | 0.880186  |
| 1 | -1.535011 | 1.630039  | 0.945594  |
| 1 | -2.047661 | 0.501008  | 3.032512  |
| 1 | -2.200773 | -1.061348 | 2.223468  |
| 1 | 1.402240  | -3.193998 | -1.251237 |
| 1 | 0.435442  | -3.261321 | 0.675013  |
| 1 | -1.033327 | -2.302578 | 0.528108  |
| 1 | 0.305406  | 2.523231  | -1.488771 |
| 1 | 2.214795  | 1.754766  | 1.436298  |
| 1 | 2.150337  | 0.037227  | 1.083465  |
| 1 | 2.892452  | -2.183738 | -2.875079 |
| 1 | 1.254736  | -1.544225 | -3.096292 |
| 1 | 2.504189  | -0.548267 | -2.322674 |
| 1 | 3.756242  | -2.939373 | -0.679164 |
| 1 | 2.800934  | -2.694442 | 0.790996  |
| 1 | 3.486775  | -1.296341 | -0.063130 |
| 1 | -0.253785 | -2.450560 | 2.816746  |
| 1 | 1.307154  | -1.738820 | 2.405835  |
| 1 | 2.522423  | 3.599446  | -1.725619 |
| 1 | 2.643267  | 1.833351  | -1.868048 |
| 1 | 3.158948  | 2.646901  | -0.377166 |
| 1 | 0.715676  | 4.631724  | -0.281864 |

|   |           |          |          |
|---|-----------|----------|----------|
| 1 | -0.427694 | 3.603975 | 0.605613 |
| 1 | 1.255076  | 3.748866 | 1.150830 |
| 1 | 0.116308  | 1.614028 | 2.722800 |
| 1 | 1.380883  | 0.541402 | 3.331966 |
